# Supplementary material for: A simple, green and low-cost agarose-based binding layer for simultaneous determination of cations and anions in aquatic systems using DGT
Source: Royal Society of Chemistry journal article supplement (doi:10.1039/d3ay00682d), 2023-01-01
Supplement: d3ay00682d1.pdf [file d3ay00682d1.pdf]

**Table S11** Results obtained in the analysis of the Certified Reference Material (EnviroMAT™ EU-L Waste Water, Low).

| <b>Element</b> | <b>Consensus value<br/>(mg/L)</b> | <b>Found value (mg/L)</b> | <b>Recovery (%)</b> |
|----------------|-----------------------------------|---------------------------|---------------------|
| As             | 0.0792                            | 0.0873                    | 110                 |
| Ba             | 0.123                             | 0.117                     | 95                  |
| Cd             | 0.0229                            | 0.0266                    | 116                 |
| Co             | 0.0805                            | 0.0705                    | 88                  |
| Cr             | 0.0612                            | 0.0557                    | 91                  |
| Cu             | 0.107                             | 0.099                     | 93                  |
| Fe             | 0.0654                            | 0.0531                    | 81                  |
| Mn             | 0.121                             | 0.118                     | 98                  |
| Mo             | 0.0404                            | 0.0366                    | 91                  |
| Ni             | 0.0816                            | 0.0795                    | 97                  |
| Pb             | 0.0413                            | 0.0403                    | 98                  |
| Sb             | 0.0186                            | 0.0232                    | 125                 |
| Se             | 0.0265                            | 0.0333                    | 126                 |
| Tl             | 0.0824                            | 0.0943                    | 114                 |
| V              | 0.0484                            | 0.0482                    | 100                 |
| Zn             | 0.0292                            | 0.0296                    | 101                 |
